# Supplementary material for: Hierarchical assembly and modeling of DNA nanotube networks using Y-shaped DNA origami seeds
Source: Royal Society of Chemistry journal article supplement (doi:10.1039/d4nr01066c), 2024-01-01
Supplement: d4nr01066c1.pdf [file d4nr01066c1.pdf]

# Hierarchical Assembly and Modeling of DNA Nanotube Networks Using Y-Shaped DNA Origami Seeds

Yanqi Jiang<sup>a,\*</sup>, Michael S. Pacella<sup>a,\*</sup>, Sojeong Lee<sup>b</sup>, Jasen Zhang<sup>a</sup>, Jonathan A. Gunn<sup>a</sup>, Paul Vallejo<sup>a</sup>, Pragma Singh<sup>a</sup>, Tiffany Hou<sup>a</sup>, Evan Liu<sup>a</sup> and Rebecca Schulman<sup>a,c</sup>

<sup>a</sup>Department of Chemical and Biomolecular Engineering, Johns Hopkins University, Baltimore, Maryland 21218, United States

<sup>b</sup>Department of Biomedical Engineering, Johns Hopkins University, Baltimore, Maryland 21218, United States

<sup>c</sup>Department of Computer Science, Johns Hopkins University, Baltimore, Maryland 21218, United States

\* These authors contributed equally.

## Contents

### 1. DNA Nanotube and Seed Design with Sequences

1.1 Design of DNA nanotubes

1.2 Design of Y-shaped DNA origami seeds

1.3 Design of labeling strands and attachments

### 2. Methods and Protocols

2.1 Self-assembly of nanotube networks

2.1.1 Y-shaped DNA origami seeds (YSA and YSB)

2.1.2 Y-seeded nanotube architecture (YNA and YNB) growth

2.1.3 Network formation

2.2 Microscopy and Processing

### 3. Additional Data and Analysis

3.1 Network growth simulation

3.2 Edge and blob detection

### 4. Supplementary Figures

# 1. DNA Nanotube and Seed Design with Sequences

All DNA strands used in this study were synthesized by Integrated DNA Technologies, Inc. (IDT) except the M13mp18 scaffold strand, which was purchased from Bayou Biolabs. The DNA nanotube tile and adapter strands were PAGE purified while Cy3 and ATTO488 fluorophore-modified strands and biotin-modified strands were HPLC purified. Concentrations for DNA tile and adapter strands were determined by measuring absorbance at 260 nm <sup>[1]</sup>; for other strands we relied on IDT to determine solution concentrations.

## 1.1. Design of DNA nanotubes

The tile design and sequences in this study are adopted from Rothmund et al. <sup>[2]</sup> Nanotubes contained two types of DNA tiles, termed REd and SEd arranged in a diagonal lattice (Figure S1), and the sequences for REd and SEd tiles are listed in the Table S1 below.

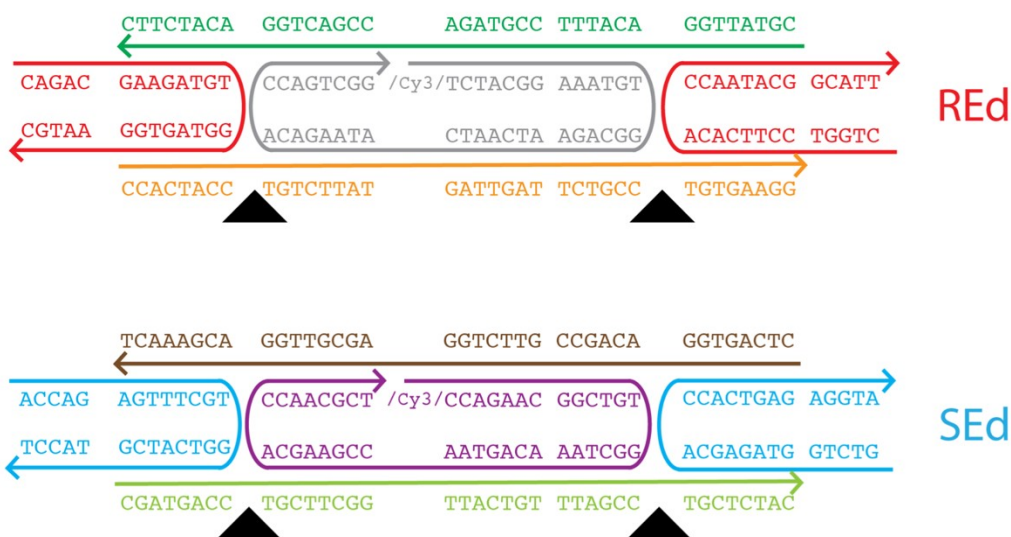

**Figure S1: Design schematic of DAE-E DNA tiles used to form nanotubes.** The two types of tiles assemble into a diagonal lattice that forms a nanotube. <sup>[2]</sup>

**Table S1: REd and SEd nanotube tile sequences: (5'--> 3')**

|          |                                                 |
|----------|-------------------------------------------------|
| RE-1     | CGTATTGGACATTTCCGTAGACCGACTGGACATCTTC           |
| RE-2EE01 | CTGGTCCTTCACACCAATACGGCATT                      |
| RE-3Cy3  | /Cy3/TCTACGGAAATGTGGCAGAATCAATCATAAGACACCAGTCGG |
| RE-4     | CAGACGAAGATGTGGTAGTGGAAATGC                     |
| RE-5     | CCACTACCTGTCTTATGATTGATTCTGCCTGTGAAGG           |
| SE-1     | CTCAGTGGACAGCCGTTCTGGAGCGTTGGACGAAACT           |

|          |                                                 |
|----------|-------------------------------------------------|
| SE-2DIAG | GTCTGGTAGAGCACCCTGAGAGGTA                       |
| SE-3Cy3  | /Cy3/CCAGAACGGCTGTGGCTAAACAGTAACCGAAGCACCAACGCT |
| SE-4DIAG | ACCAGAGTTTCGTGGTCATCGTACCT                      |
| SE-5     | CGATGACCTGCTTCGGTTACTGTTTAGCCTGCTCTAC           |

/Cy3/ denotes Cy3 fluorophore covalently attached to the 5' end of the DNA.

## 1.2. Design of Y-shaped DNA origami seeds

The DNA origami seeds used in this study are Y-shaped DNA origami nanostructures. YSA is directly adopted from Jorgenson et al.<sup>[3]</sup> and we revised its design to build YSB. YSA and YSB only have different sets of adapter tiles, allowing each of them to nucleate nanotubes from their 3 arms.

### Staples and struts design

The staples and struts design for the Y-seeds in this study are adopted from Jorgenson et al.<sup>[3]</sup> Both YSA and YSB used the same staples and struts.

### Adapter strands design

The adapter tiles were designed to serve as templates onto which nanotube tiles can attach. The complete tile sequences of the YSA adapters are shown below (Supplementary Figure S2 and Table S2-4). The YSB adapters consisted of the YSA strands whose names in the lists that follow end in 1\_YSA, 3\_YSA, or 5\_YSA (the orange, green and brown strands in Supplementary Figure S2) but have different strands that present sticky ends (those in blue in Supplementary Figure S2 and with names ending in 2\_YSA or 2\_YSB). The sequences that are different in YSA and YSB are in red type in Table S2-4; the corresponding sequences for the YSB adapters are then listed in Table S5. For example, the strand AD1\_2REd\_armC\_2\_YSA is replaced by AD1\_2REd\_armC\_2\_YSB when making YSB.

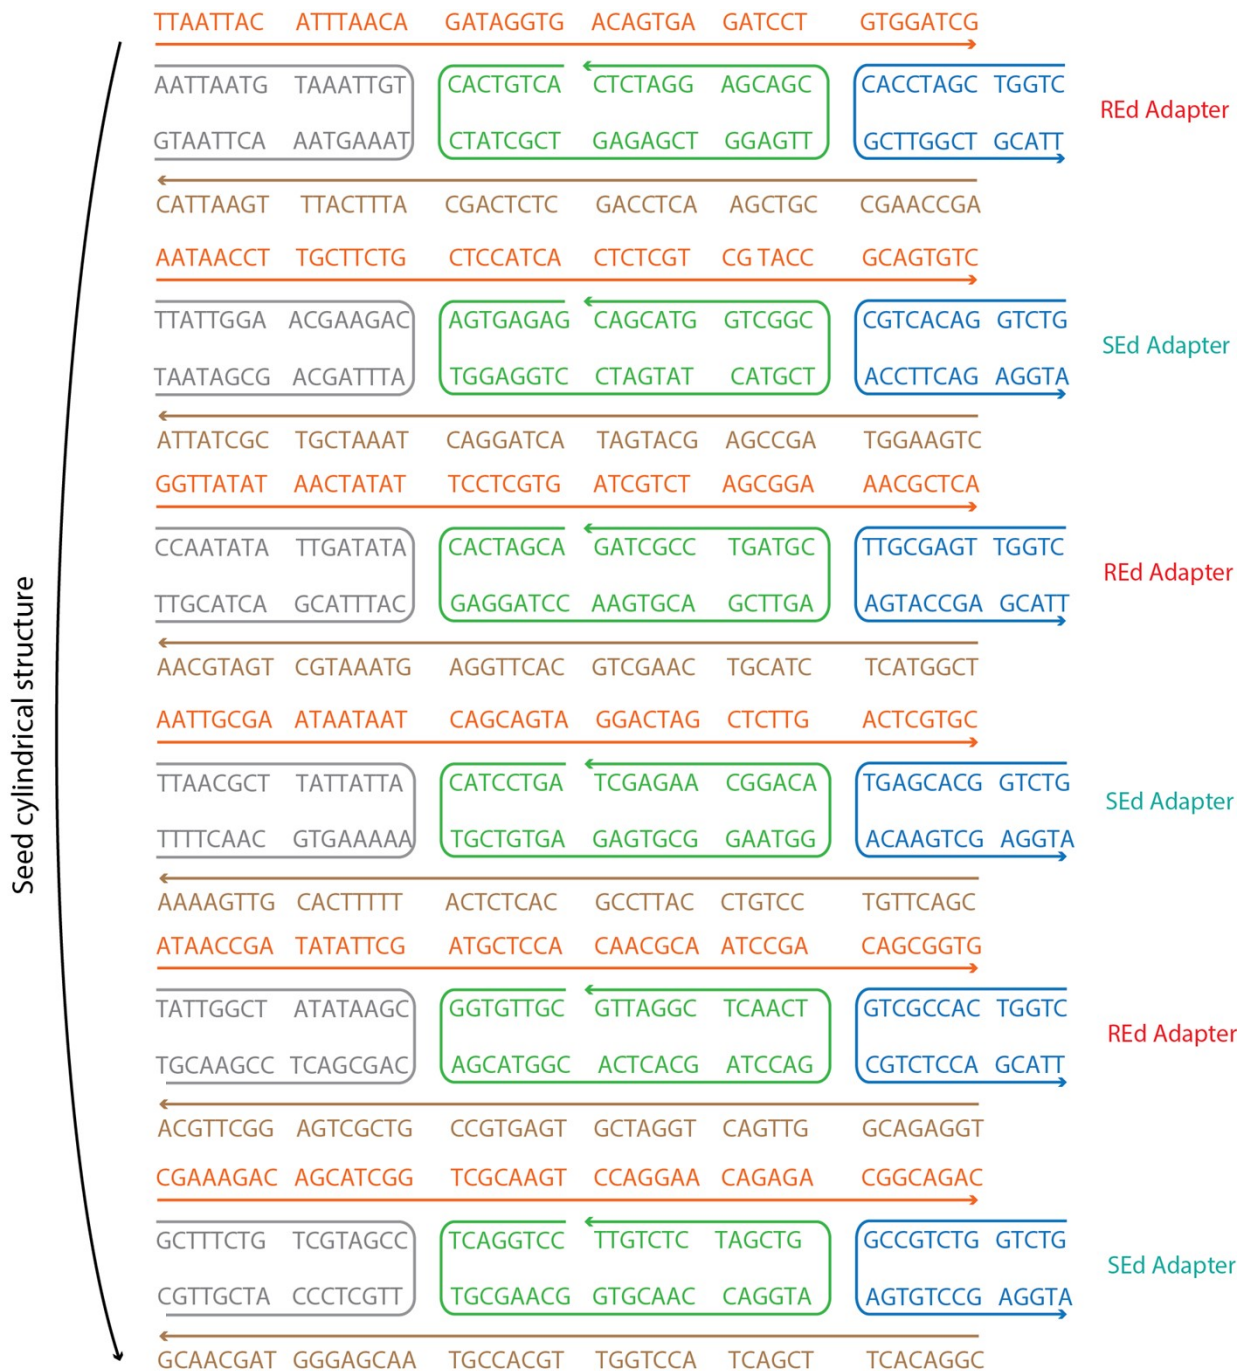

**Figure S2: The structure of YSA adapters for arm A of the Y-shaped seed.** The adapters on each of the three arms share the depicted structure of adapters with different sequences). The gray lines and corresponding sequences are parts of the M13mp18 scaffold.

**Table S2: YSA A-Arm Adapter Tile Sequences**

|                              |                                                             |
|------------------------------|-------------------------------------------------------------|
| AD1REd_armA_1_YSA            | TTA ATT ACA TTT AAC AGA TAG GTG ACA GTG AGA TCC TGT GGA TCG |
| AD1_2REd_armA_3_YSA          | ACT GTC ACC TAT CGC TGA GAG CTG GAG TTC GAC GAG GAT CTC     |
| AD2REd_armA_5_YSA            | AGC CAA GCC GTC GAA CTC CAG CTC TCA GCA TTT CAT TTG AAT TAC |
| <b>AD1_2REd_armA_2_YSA</b>   | <b>CTG GTC GAT CCA CGC TTG GCT GCA TT</b>                   |
| AD3SEd_armA_1_YSA            | AAT AAC CTT GCT TCT GCT CCA TCA CTC TCG TCG TAC CGC AGT GTC |
| AD3_4SEd_armA_3_YSA          | GAG AGT GAT GGA GGT CCT AGT ATC ATG CTC GGC TGG TAC GAC     |
| AD4SEd_armA_5_YSA            | CTG AAG GTA GCC GAG CAT GAT ACT AGG ACT AAA TCG TCG CTA TTA |
| <b>AD3_4SEd_armA_2_YSA</b>   | <b>GTC TGG ACA CTG CAC CTT CAG AGG TA</b>                   |
| AD5REd_armA_1_YSA            | GGT TAT ATA ACT ATA TTC CTC GTG ATC GTC TAG CGG AAA CGC TCA |
| AD5_6REd_armA_3_YSA          | ACG ATC ACG AGG ATC CAA GTG CAG CTT GAC GTA GTC CGC TAG     |
| AD6REd_armA_5_YSA            | TCG GTA CTC TAC GTC AAG CTG CAC TTG GAG TAA ATG CTG ATG CAA |
| <b>AD5_6REd_armA_2_YSA</b>   | <b>CTG GTT GAG CGT TAG TAC CGA GCA TT</b>                   |
| AD7SEd_armA_1_YSA            | AAT TGC GAA TAA TAA TCA GCA GTA GGA CTA GCT CTT GAC TCG TGC |
| AD7_8SEd_armA_3_YSA          | AGT CCT ACT GCT GTG AGA GTG CGG AAT GGA CAG GCA AGA GCT     |
| AD8SEd_armA_5_YSA            | CGA CTT GTC CTG TCC ATT CCG CAC TCT CAT TTT TCA CGT TGA AAA |
| <b>AD7_8SEd_armA_2_YSA</b>   | <b>GTC TGG CAC GAG TAC AAG TCG AGG TA</b>                   |
| AD9REd_armA_1_YSA            | ATA ACC GAT ATA TTC GAT GCT CCA CAA CGC AAT CCG ACA GCG GTG |
| AD9_10REd_armA_3_YSA         | CGT TGT GGA GCA TGG CAC TCA CGA TCC AGT CAA CTC GGA TTG     |
| AD10REd_armA_5_YSA           | TGG AGA CGG TTG ACT GGA TCG TGA GTG CCG TCG CTG AGG CTT GCA |
| <b>AD9_10REd_armA_2_YSA</b>  | <b>CTG GTC ACC GCT GCG TCT CCA GCA TT</b>                   |
| AD11SEd_armA_1_YSA           | CGA AAG ACA GCA TCG GTC GCA AGT CCA GGA ACA GAG ACG GCA GAC |
| AD11_12SEd_armA_3_YSA        | CCT GGA CTT GCG AAC GGT GCA ACC AGG TAG TCG ATC TCT GTT     |
| AD12SEd_armA_5_YSA           | CGG ACA CTT CGA CTA CCT GGT TGC ACC GTA ACG AGG GTA GCA ACG |
| <b>AD11_12SEd_armA_2_YSA</b> | <b>GTC TGG TCT GCC GAG TGT CCG AGG TA</b>                   |

**Table S3: YSA B-arm Adapter Tile Sequences**

|                            |                                                             |
|----------------------------|-------------------------------------------------------------|
| AD1REd_armB_1_YSA          | ACA ACA TGT TCA GCT ACC AGC ACG ACT CTA GGT GTA GCG TGA GCG |
| AD1_2REd_armB_3_YSA        | AGA GTC GTG CTG GCG TCC GAG ACC TCA CAG GTG ACT ACA CCT     |
| AD2REd_armB_3_YSA          | AGC GAG GAT CAC CTG TGA GGT CTC GGA CGA TGC AGA ACG CGC CTG |
| <b>AD1_2REd_armB_2_YSA</b> | <b>CTG GTC GCT CAC GTC CTC GCT GCA TT</b>                   |
| AD3SEd_armB_1_YSA          | CGC ACT CAT CGA GAA CCG ATC CGA CGC CAT GTC CAA GAC GGA ACA |
| AD3_4SEd_armB_3_YSA        | TGG CGT CGG ATC GCT ACC AGT CAC ACC ACT AGC ACT TGG ACA     |

|                              |                                                             |
|------------------------------|-------------------------------------------------------------|
| AD4SEd_armB_3_YSA            | GAC TCG GCT GCT AGT GGT GTG ACT GGT AGA AGC AAG CCG TTT TTA |
| <b>AD3_4SEd_armB_2_YSA</b>   | <b>GTC TGT GTT CCG TGC CGA GTC AGG TA</b>                   |
| AD5REd_armB_1_YSA            | AAT AAG AGC AAG AAA CCT GGA CGA GCT ACC AAG ACC ATT CCT GAC |
| AD5_6REd_armB_3_YSA          | GTA GCT CGT CCA GAG GCT GCG TTC GTC GGT AGT GTG GTC TTG     |
| AD6REd_armB_3_YSA            | CAC TCA GGC ACT ACC GAC GAA CGC AGC CTA ATG AAA TAG CAA TAG |
| <b>AD5_6REd_armB_2_YSA</b>   | <b>CTG GTG TCA GGA ACC TGA GTG GCA TT</b>                   |
| AD7SEd_armB_1_YSA            | GCA GTA TGT TAG CAA ATG GAG CGA ACC GTC ATG CCT GTT GCT CGC |
| AD7_8SEd_armB_3_YSA          | ACG GTT CGC TCC AAC ATC GTC ACA GTG GCT ACG GCA GGC ATG     |
| AD8SEd_armB_3_YSA            | GTA TCC GAC CGT AGC CAC TGT GAC GAT GTC GTA GAA AAT ACA TAC |
| <b>AD7_8SEd_armB_2_YSA</b>   | <b>GTC TGG CGA GCA ATC GGA TAC AGG TA</b>                   |
| AD9REd_armB_1_YSA            | TCA GAG CCG CCA CCC TGT GTC CTG CTC CTA GTC GCA GAT GCG GAG |
| AD9_10REd_armB_3_YSA         | AGG AGC AGG ACA CGA GCC AGC GTA AGG ATG TCG GCT GCG ACT     |
| AD10REd_armB_3_YSA           | AGT CCA CAC CGA CAT CCT TAC GCT GGC TCC AGA ACC GCC ACC CTC |
| <b>AD9_10REd_armB_2_YSA</b>  | <b>CTG GTC TCC GCA TTG TGG ACT GCA TT</b>                   |
| AD11SEd_armB_1_YSA           | AAT GGA AAG CGC AGT CGT AGA CCT AGA GGC GAC GCA AGT GTC TCG |
| AD11_12SEd_armB_3_YSA        | CCT CTA GGT CTA CCG TGG TTC GGA GCT GAT CGA GTT GCG TCG     |
| AD12SEd_armB_3_YSA           | CGC CAA TCC TCG ATC AGC TCC GAA CCA CGT CTG AAT TTA CCG TTC |
| <b>AD11_12SEd_armB_2_YSA</b> | <b>GTC TGC GAG ACA CGA TTG GCG AGG TA</b>                   |

**Table S4: YSA C-arm Adapter Tile Sequences**

|                            |                                                             |
|----------------------------|-------------------------------------------------------------|
| AD1REd_armC_1_YSA          | GTA ATC TTG ACA AGA AGT CTC GGT TGG ACA AGG CGA CTG GAG TGA |
| AD1_2REd_armC_3_YSA        | GTC CAA CCG AGA CAG CGT TAC GAG GTA CAG TCA GGT CGC CTT     |
| AD2REd_armC_3_YSA          | TAA TGG CAC TGA CTG TAC CTC GTA ACG CTC CGG ATA TTC ATT ACC |
| <b>AD1_2REd_armC_2_YSA</b> | <b>CTG GTT CAC TCC ATG CCA TTA GCA TT</b>                   |
| AD3SEd_armC_1_YSA          | GAA TCG TCA TAA ATA TGC CTA GAC TCC GAC GTG GAA CGC TAA CCA |
| AD3_4SEd_armC_3_YSA        | TCG GAG TCT AGG CTG GCA TGA GCA TCT CGC AGT GGT TCC ACG     |
| AD4SEd_armC_3_YSA          | CTG GAA GTC ACT GCG AGA TGC TCA TGC CAT CAT TGA ATC CCC CTC |
| <b>AD3_4SEd_armC_2_YSA</b> | <b>GTC TGT GGT TAG CAC TTC CAG AGG TA</b>                   |
| AD5REd_armC_1_YSA          | AAT ATC GCG TTT TAA TAG CGG AGG TAC GGA GTC ACC ATT GCC ATG |
| AD5_6REd_armC_3_YSA        | CCG TAC CTC CGC TTC GCA TCT GAG TCG CTG GAT GTG GTG ACT     |
| AD6REd_armC_3_YSA          | TGA ACC AGC ATC CAG CGA CTC AGA TGC GAT CGA GCT TCA AAG CGA |
| <b>AD5_6REd_armC_2_YSA</b> | <b>CTG GTC ATG GCA ACT GGT TCA GCA TT</b>                   |
| AD7SEd_armC_1_YSA          | TTT TAA ATA TGC AAC TGA CTC TCG ACA TGG TCC GAA CTC GCT TGA |

|                              |                                                             |
|------------------------------|-------------------------------------------------------------|
| AD7_8SEd_armC_3_YSA          | CAT GTC GAG AGT CAC GCT CTA CTA CGC CAT CGG TGT TCG GAC     |
| AD8SEd_armC_3_YSA            | TGA GGC TAA CCG ATG GCG TAG TAG AGC GTA AAG TAC GGT GTC TGG |
| <b>AD7_8SEd_armC_2_YSA</b>   | <b>GTC TGT CAA GCG ATA GCC TCA AGG TA</b>                   |
| AD9REd_armC_1_YSA            | AAG GTG GCA TCA ATT CGT GCC TTC ACG TTG CTG TCG TTC CTA TCG |
| AD9_10REd_armC_3_YSA         | AAC GTG AAG GCA CAG ACA CTC CGT CAG AGG CAA CAC GAC AGC     |
| AD10REd_armC_3_YSA           | CAT GAG GCG TTG CCT CTG ACG GAG TGT CTT ACT AAT AGT AGT AGC |
| <b>AD9_10REd_armC_2_YSA</b>  | <b>CTG GTC GAT AGG AGC CTC ATG GCA TT</b>                   |
| AD11SEd_armC_1_YSA           | AAA ATT AAG CAA TAA ACG ACG GAC GCT TGT GGA TGA GGT CGC ACT |
| AD11_12SEd_armC_3_YSA        | CAA GCG TCC GTC GAG ACA GTG TAG GAC GAC ACA GCT CAT CCA     |
| AD12SEd_armC_3_YSA           | GGC TCG CTC TGT GTC GTC CTA CAC TGT CTG CCT CAG AGC ATA AAG |
| <b>AD11_12SEd_armC_2_YSA</b> | <b>GTC TGA GTG CGA CAG CGA GCC AGG TA</b>                   |

**Table S5: YSB Adapter A/B/C-arm Tile Sequences (Strand 2)**

|                       |                                    |
|-----------------------|------------------------------------|
| AD1_2REd_armA_2_YSB   | CAG ACC GAT CCA CGC TTG GCT AAT GC |
| AD3_4SEd_armA_2_YSB   | ACC AGG ACA CTG CAC CTT CAG TAC CT |
| AD5_6REd_armA_2_YSB   | CAG ACT GAG CGT TAG TAC CGA AAT GC |
| AD7_8SEd_armA_2_YSB   | ACC AGG CAC GAG TAC AAG TCG TAC CT |
| AD9_10REd_armA_2_YSB  | CAG ACC ACC GCT GCG TCT CCA AAT GC |
| AD11_12SEd_armA_2_YSB | ACC AGG TCT GCC GAG TGT CCG TAC CT |
| AD1_2REd_armB_2_YSB   | CAG ACC GCT CAC GTC CTC GCT AAT GC |
| AD3_4SEd_armB_2_YSB   | ACC AGT GTT CCG TGC CGA GTC TAC CT |
| AD5_6REd_armB_2_YSB   | CAG ACG TCA GGA ACC TGA GTG AAT GC |
| AD7_8SEd_armB_2_YSB   | ACC AGG CGA GCA ATC GGA TAC TAC CT |
| AD9_10REd_armB_2_YSB  | CAG ACC TCC GCA TTG TGG ACT AAT GC |
| AD11_12SEd_armB_2_YSB | ACC AGC GAG ACA CGA TTG GCG TAC CT |
| AD1_2REd_armC_2_YSB   | CAG ACT CAC TCC ATG CCA TTA AAT GC |
| AD3_4SEd_armC_2_YSB   | ACC AGT GGT TAG CAC TTC CAG TAC CT |
| AD5_6REd_armC_2_YSB   | CAG ACC ATG GCA ACT GGT TCA AAT GC |
| AD7_8SEd_armC_2_YSB   | ACC AGT CAA GCG ATA GCC TCA TAC CT |
| AD9_10REd_armC_2_YSB  | CAG ACC GAT AGG AGC CTC ATG AAT GC |
| AD11_12SEd_armC_2_YSB | ACC AGA GTG CGA CAG CGA GCC TAC CT |

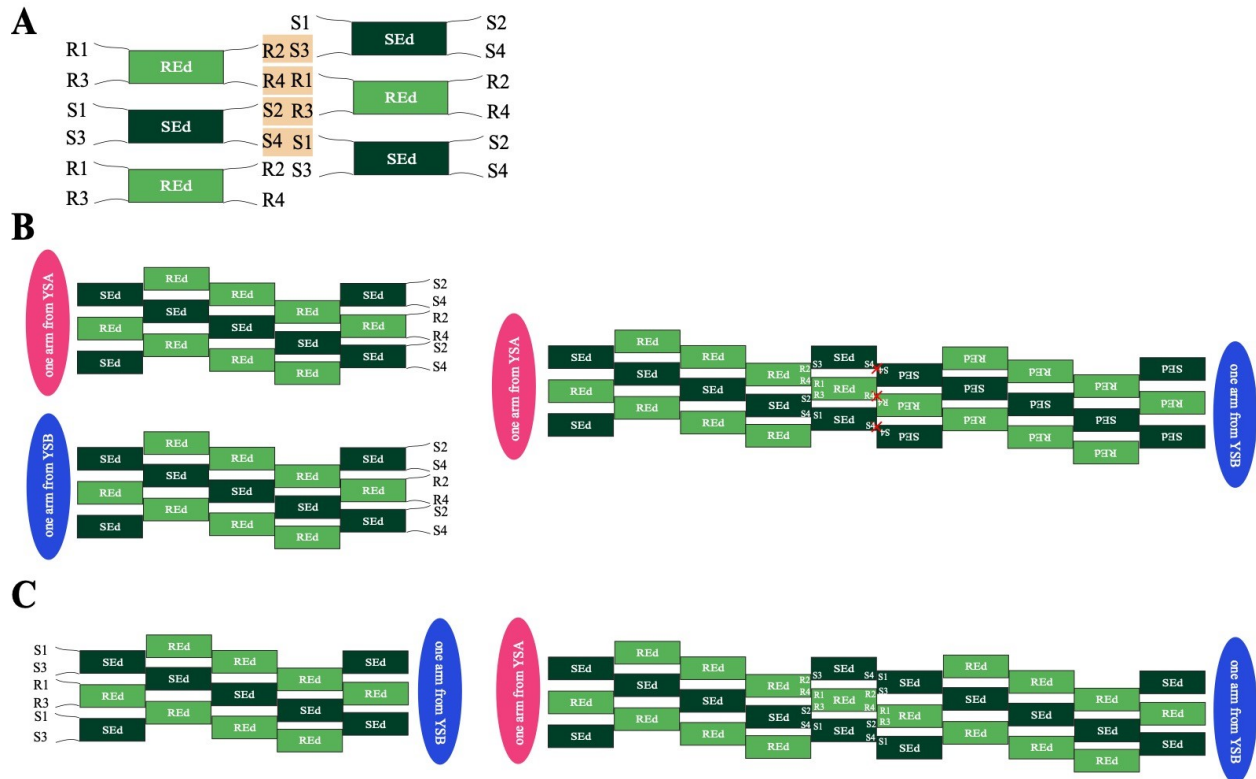

**Figure S3: The design of different adapters for YSA and YSB to ensure complementary ends of YNA and YNB.** (A) Shows the simplified diagram of REd and SEd tile assembly according to Figure S1 and the hybridization of their adapter strands. R1,2,3,4 and S1,2,3,4 denote the four sticky ends of REd and SEd, which assemble diagonally, allowing hybridization only between specific pairs of strands (e.g. R2-S3, R4-R1, etc.) (B) If YSA and YSB used the same adapter (that is, if YSA were entirely identical to YSB), the YNA and YNB sticky ends would be identical and would not bind to one another, as the diagram on the right side shows. (C) By changing the adapter design of YSB so that the nanotubes are able to nucleate on the other side of the origami structure, we ensure that YNB will have complementary sticky ends to YNA, and end-to-end joining will occur specifically between YNA and YNB. Connections between YNA-YNA or YNB-YNB cannot form due to their identical sticky ends.

### 1.3 Design of labeling strands and attachments

The design of the fluorescent labelling strands for nanotube seeds was adopted from Jorgenson et al [3]. As mentioned in the text, some experiments used ATTO 647 to label YSA and ATTO 488 fluorophore to label YSB while in other experiments ATTO 488 was used to label both YSA and YSB. To label each of these structures, we used a labelling system consisting of 80 attachment strands and a labeling strand. Each attachment strand contains one domain that binds to the unfolded portion of M13mp18 scaffold and the other domain that binds to the labeling strand. The labeling strand has a fluorophore dye on its 5' end. In the experiments whose results are depicted in Figure 5 and elsewhere as mentioned in the main text, only 25% of the Y seeds were prepared with attachment strands, *i.e.* 1 part labeled Y-seeds were mixed with 3 parts unlabeled Y-seeds.



## Labeling strand sequences

labeling\_strand\_ATTO647 /5ATTO647/AAGCGTAGTCGGATCTC  
labeling\_strand\_ATTO488 /5ATTO488N/AAGCGTAGTCGGATCTC

## Attachment strand sequences

We use the first 80 attachment strands in Mohammed *et al* <sup>[4]</sup> from Unused\_m13mp18\_01 to Unused\_m13mp18\_80.

## 2. Methods and protocols

### 2.1 Self-assembly of nanotube networks

Y-seeded nanotube architectures were grown from Y-shaped DNA origami seeds which first assembled separately. Pre-annealed YSA and YSB were added to the tile solution and were referred to as solution A and solution B respectively. Tiles nucleate on either YSA or YSB to grow nanotubes and after 24 hours of growth, solution A and solution B were mixed at a ratio of 1:1 to create solution C to form networks.

#### 2.1.1 Y-shaped DNA origami seeds (YSA and YSB)

There are two types of hierarchical Y-seeds in this study: YSA and YSB. Both types share the same recipe in Table S6 while using different adapters (sequences are listed in Section 1.2)

**Table S6: Recipe of YSA**

| YSA                         | Final concentration (nM, if not specified) | Stock concentration (nM, if not specified) | Add ( $\mu$ L) |
|-----------------------------|--------------------------------------------|--------------------------------------------|----------------|
| H <sub>2</sub> O            |                                            |                                            | 5.05           |
| BSA (mg/mL)                 | 0.05                                       | 1                                          | 2.50           |
| Y-shaped seed arm A staples | 100                                        | 3030                                       | 1.65           |

|                                 |        |          |       |
|---------------------------------|--------|----------|-------|
| Y-shaped seed arm B staples     | 100    | 3030     | 1.65  |
| Y-shaped seed arm C staples     | 100    | 3030     | 1.65  |
| labeling attachment strand      | 100    | 1000     | 5.00  |
| labeling strand ATTO 488        | 5000   | 100,000  | 2.50  |
| Struts                          | 100    | 1000     | 5.00  |
| Adapter strands YSA arm A mix   | 100    | 1000     | 5.00  |
| Adapter strands YSA arm B mix   | 100    | 1000     | 5.00  |
| Adapter strands YSA arm C mix   | 100    | 1000     | 5.00  |
| M13mp18 scaffold                | 10     | 100      | 5.00  |
| 10x TAE Mg <sup>2+</sup> buffer | 1 fold | 10 folds | 5.00  |
| Total                           |        |          | 50.00 |

The recipe for the Y-shaped B seeds is the same as above, only replacing adapter strands of YSA (marked in red) with those for YSB.

*BSA*: BSA is used to prevent DNA nanostructures from non-specific attachment to Eppendorf tubes, pipette tips, etc.

*Arm A/B/C staples mix*: Each mixture (A, B or C) containing all 36 staple strands in equal volumes, to a final concentration of staple stocks in water to be 3.03μM each.

*Struts mix*: The struts are used to connect each pair of arms in the Y-seeds. Mixtures containing all 30 struts strands in water.

*Adapters (Y-shaped seed arm A, B, C)*: Each mixture (arm A, B, or C mix) containing all adapter strands of one arm at a concentration of 1μM in water except the strands with sticky ends [e.g.: For YSA A-arm adapters the sticky ends are: AD1\_2REd\_armA\_2\_YSA, AD1\_4SEd\_armA\_2\_YSA, AD1\_6REd\_armA\_2\_YSA, AD1\_8SEd\_armA\_2\_YSA, AD1\_10REd\_armA\_2\_YSA, AD1\_12SEd\_armA\_2] which are at 2μM.

*Labeling attachment strand*: Mixture containing all 80 labeling attachment strands in water at a concentration of 1000nM.

*10x TAE Mg<sup>2+</sup> buffer*: Mixture containing 40mM tris-Acetate, 10mM EDTA and 125mM magnesium acetate.

### **Y-seed annealing protocol [3]:**

- Heat to 65°C for 15 mins.
- Drop the temperature to 47°C immediately and then incubate at 47°C for 48h.
- Drop the temperature from 47°C to room temperature (20°C) at 1°C/min.

### **Y-seeds purification protocol [5]:**

We used Amicon Ultra 100 kDa filters to purify the Y-seeds to remove excess staples, adapters, and fluorescent labeling strands.

- Mix 50  $\mu\text{L}$  of unpurified seeds with 350  $\mu\text{L}$  1x TAE Mg<sup>2+</sup> buffer in one 0.5 mL filter.
- Centrifuge the filter at 3000g for 4 mins and resuspended the remaining solution with another 350 $\mu\text{L}$  1x TAE Mg<sup>2+</sup> buffer.
- Repeat step 2 two more times.

After the purification, the Y-seeds can be kept in 4°C fridge for 1 to 2 weeks.

### **Y-seeds stock concentration measurement**

The concentration was measured by adopting the method developed by Agrawal *et al* [5]. After purification, an imaging solution was prepared by mixing 0.3  $\mu\text{L}$  Y-seed solution with 19.7  $\mu\text{L}$  1x TAE Mg<sup>2+</sup> buffer. 6  $\mu\text{L}$  mixture was then transferred to a glass slide to be imaged under a fluorescence microscope with 60x objective. We continued to dilute the purified seeds until 100-200 seeds per field of view (87  $\mu\text{m}$  x 87  $\mu\text{m}$ ) were observed, indicating an approximate seed concentration of 6pM in the imaged solution.

#### **2.1.2 Y-seeded nanotube architectures (YNA and YNB) growth**

Additional adapter strands were included in the nanotube assembly mixture as we previously found that the presence of additional adapters improved yields of nanotube nucleation from seeds potentially due to attachment of additional adapters to empty adapter binding sites [5].

**Table S7: Recipe for Y-seeded nanotube architectures A (YNA) grown from YSA**

|                  | Final concentration (nM, if not specified) | Stock concentration (nM, if not specified) | Add ( $\mu\text{L}$ ) |
|------------------|--------------------------------------------|--------------------------------------------|-----------------------|
| H <sub>2</sub> O |                                            |                                            | 11.8                  |
| BSA (mg/mL)      | 0.05                                       | 1                                          | 1                     |
| REd SEd tiles    | 50                                         | 400                                        | 2.5                   |

|                                 |         |          |     |
|---------------------------------|---------|----------|-----|
| A arm YSA adapter               | 4       | 100      | 0.8 |
| B arm YSA adapter               | 4       | 100      | 0.8 |
| C arm YSA adapter               | 4       | 100      | 0.8 |
| Seeds<br>(ATTO 488 labeled)     | A 0.006 | 0.4      | 0.3 |
| 10x TAE Mg <sup>2+</sup> buffer | 1 fold  | 10 folds | 2   |
| Total                           |         |          | 20  |

**Table S8: Recipe for Y-seeded nanotube architectures B (YNB) grown from YSB**

|                                 | Final concentration<br>(nM, if not specified) | Stock concentration<br>(nM, if not specified) | Add ( $\mu$ L) |
|---------------------------------|-----------------------------------------------|-----------------------------------------------|----------------|
| H <sub>2</sub> O                |                                               |                                               | 11.8           |
| BSA (mg/mL)                     | 0.05                                          | 1                                             | 1              |
| Red SEd tiles                   | 50                                            | 400                                           | 2.5            |
| A arm YSB adapter               | 4                                             | 100                                           | 0.8            |
| B arm YSB adapter               | 4                                             | 100                                           | 0.8            |
| C arm YSB adapter               | 4                                             | 100                                           | 0.8            |
| YSB<br>(ATTO 488 labeled)       | 0.006                                         | 0.4                                           | 0.3            |
| 10x TAE Mg <sup>2+</sup> buffer | 1 fold                                        | 10 folds                                      | 2              |
| Total                           |                                               |                                               | 20             |

*Red SEd tiles*: Mixtures of REd and SEd tiles containing all single strands in water at a stock concentration of 400 nM except the strands with sticky ends which are at 800 nM. The composition of the *Red SEd tiles* mixture means that the strands for each tile except the sticky ends are present at 25 nM while sticky ends are present at 50nM.

Initially, we mixed the above except for YSA or YSB to produce a solution with a volume of 19.7  $\mu$ L. The solutions were then annealed following the first part of the protocol below. Once the tile mixture reached 45°C, 0.3 $\mu$ L of pre-annealed YSA or YSB seeds are added to the mixture to a final concentration of 6 pM. The samples were then incubated at 32°C for at least 15 hours to allow nanotubes to nucleate from Y-seeds and grow.

**Annealing protocol:**

- Heat to 90°C
- Drop the temperature from 90°C to 45°C at 1°C/min
- Pause at 45°C. Quickly add seeds to tile solution
- Drop the temperature from 45°C to 32°C at 1°C/min
- Incubate at 32°C for around 24 hours

### 2.1.3 Network formation

A schematic of the network formation process is shown in Figure 2 in the main text. After separately incubating Solutions A and B for about 24 hours, Solutions A and B were mixed in equal volumes in a new tube as Solution C, which was also incubated at 32°C. Solution C was incubated with aliquots being characterized at the times of 1 hour, 4 hours, 8 hours and longer.

## 2.2 Microscopy and Image Processing

All micrographs were taken using an Olympus IX71 fluorescence microscope with a 60x objective (Olympus NA=1.45, oil immersion) and 1.6x additional magnification. The camera used was an Andor iXon3 Model (No: DU-897E-CS0-#BV). Samples containing Y-shaped DNA origami seeds and Y-seeded nanotube architectures were usually diluted by 10-fold (1μL of sample solution mixed with 9μL of 1x TAE Mg<sup>2+</sup> buffer) and an aliquot of the diluted solution was applied to glass slides and covered by a coverslip. The dilution was made to ensure that each structure and connection was clear and observable, by preventing different structures from overlapping one another.

Nanotubes were labeled with Cy3 and were imaged using a Cy3 filter cube. YSA and YSB labeled with ATTO 488 were imaged using an ATTO 488 filter cube.

Fluorescence micrographs of Y-seeds were analyzed using the Fiji image J plugin Trackmate to count the number of seeds, when calculating the seed concentration as described in section 2.1.1 before mixing with tiles. The length of each pixel was 170 nm.

## 3. Additional Data and Analysis

All Python code used in this work is available through GitHub at <https://github.com/yanqijiangjhu/Supplementary-Information-Codes>

### 3.1 Network growth simulation

To understand whether the observed sizes of networks are consistent with a model in which network-size independent end-to-end joining produces networks of a given size, we developed a stochastic kinetic simulation of the joining process. We used the Gillespie method for exact sampling of stochastic kinetics for this simulation. [6, 7, 8]

At time 0, the initial species present were Y-seeded nanotube architectures with one, two or three arms nucleated on either YSA or YSB. 12% (YSA) and 10% (YSB) of the structures were one-armed structures, 42% (YSA) and 36% (YSB) of these structures were two-armed structures, and 46% (YSA) and 54% (YSB) of these were three-armed structures, which were the fraction of structures measured as shown in Figure 3 in the main text. 1000 YSA and 1000 YSB were in the system at time 0. Arms that did not present nanotubes were assumed to be unavailable for joining. Thus, for example, a Y-seeded nanotube architecture with one arm was assumed to have only 1 site available for end-to-end joining.

We assumed that joining reactions were possible between pairs of available ends of complementary type (A-B is complementary, while A-A or B-B are not complementary) and that joining rates were the same for all joining reactions. The microscopic second-order rate constant  $k_{\text{joining}}$  is used to denote the rate constant of a joining reaction. The joining of ends of complementary types within the same network was not allowed. Simulations were run until no possible joining events remained. 50 identical simulation trajectories (*i.e.* samples) for each  $k_{\text{joining}}$  were run and their total frequencies were used to plot the data in Fig. 5 in the main text.

The following describes a simple example to illustrate the assumptions of a system containing one YSA and two YSB that each have 2 arms. In this case, there are three potential network candidates, which each has one node (seed). Candidate 1 only has A-type nanotube ends (*i.e.* attachment sites), while candidates 2 and 3 only have B-type nanotube ends. The number of potential joining reactions and the total rates of all the reactions in the system would be calculated by summing the rates of the reactions for each pair of potential reactants.

1. The total joining reaction rate for the reaction between network candidate 1 (the YNA with two arms), and candidate 2 (the first YNB with two arms) is calculated as follows:

$$\begin{aligned}
 & k_{\text{joining}} * (\text{number of A type attachment sites on candidate 1}) \\
 & * (\text{number of B type attachment sites on candidate 2}) \\
 & + k_{\text{joining}} * (\text{number of B type attachment sites on candidate 1}) \\
 & \quad * (\text{number of A type attachment sites on candidate 2}) \\
 & = ((2 * 2) + (0 * 0))k_{\text{joining}} = 4k_{\text{joining}}
 \end{aligned}$$

2. The total joining rate for the reaction between network candidate 1 (the YNA with two arms), and network candidate 3 (the second YNB with two arms) is calculated as follows:

$$\begin{aligned}
 & k_{\text{joining}} * (\text{number of A type attachment sites on candidate 1}) \\
 & * (\text{number of B type attachment sites on candidate 3}) \\
 & + k_{\text{joining}} * (\text{number of B type attachment sites on candidate 1}) \\
 & \quad * (\text{number of A type attachment sites on candidate 3}) \\
 & = ((2 * 2) + (0 * 0))k_{\text{joining}} = 4k_{\text{joining}}
 \end{aligned}$$

3. The total joining rate for the reaction between network candidate 2 (the first YNB with two arms), and network candidate 3 (the second YNB with two arms) is calculated as follows:

$$\begin{aligned}
& k_{\text{joining}} * (\text{number of A type attachment sites on candidate 2}) \\
& * (\text{number of B type attachment sites on candidate 3}) \\
& + k_{\text{joining}} * (\text{number of B type attachment sites on candidate 2}) \\
& \quad * (\text{number of A type attachment sites on candidate 3}) = ((0 * 2) + (2 * 0))k_{\text{joining}} = 0
\end{aligned}$$

The total rate of all possible reactions in this system in its current configuration would therefore be  $8k_{\text{joining}}$ .

Simulations were run with  $k_{\text{joining, sim}} = 1 / \text{s}$ . To correctly compare the times from the simulation with the times from experiments, we used a scaling constant  $q$  defined as

$$\text{Experiment time (real time)} = q * \text{Simulation time} \quad (\text{Equation 1})$$

i.e.

$$q = \frac{k_{\text{joinin, sim}}}{k_{\text{joining}}}$$

To find  $q$ , we first computed the volume (V) of the reaction system that was simulated by setting the seed concentrations for the simulation to be the same as in the experiment.

$$[\text{Seed}]_{\text{sim}} = [\text{Seed}]_{\text{real}} \quad (\text{Equation 2})$$

Since the initial concentration of each type of Y-seeded nanotube architecture used in the experiment was 6 pM, and the number of each type of Y-seeds in the simulation was 1000. Equation 2 implies that

$$\frac{1000}{6.022 * 10^{23}} \text{mole} * \frac{1}{V(L)} = 6.0 * 10^{-12} M \quad (\text{Equation 3})$$

where  $6.022 * 10^{23}$  is the Avogadro's number (referred as A in the following). Thus  $V = 2.768 * 10^{-10} \text{ L}$ .

For a bimolecular reaction, the macroscopic rate constant  $K_{\text{joining}}$  and the microscopic rate constant  $k_{\text{joining}}$  can be related by the equation:

$$k_{\text{joining}} = \frac{K_{\text{joining}}}{VA}, \quad (\text{Equation 4})$$

We assumed  $K_{\text{joining}} = 3.86 * 10^6 / \text{M/s}$  based on the measurements in our previous study [6], so that  $k_{\text{joining}} = 2.32 * 10^{-8} / \text{s}$ .

The scaling factor  $q$  is therefore given by

$$q = \frac{k_{\text{joining, sim}}}{k_{\text{joining}}} = \frac{1 / \text{s}}{2.32 * 10^{-8} / \text{s}} = 4.32 * 10^7$$

### 3.2 Edge and blob detection

To efficiently measure the sizes of the networks, we developed automated image processing techniques. <sup>[9]</sup> In the work, we use *edge and blob detection algorithms* to count the number of seeds in a network and the area that the network occupies on the slide, and the related script could be found as *network\_metrics.py* in GitHub.

We first processed images from the Cy3 channel to outline the nanotube network. Next, we used blob detection on the corresponding image in the ATTO 488 channel to identify the center of each ATTO 488-labeled Y-seeds. Finally, we combined the network outlines with the information about the seed locations to count the number of seeds in each network.

The detected blobs are bright on dark or dark on bright regions in an image. We used a Laplacian of Gaussian (LoG) function to process the seed channel of each image.

The Laplacian of Gaussian function uses three parameters: *max\_sigma*, *num\_sigma* and *threshold*.

- 1) The *max\_sigma* refers to the maximum standard deviation for Gaussian Kernel and the higher this value is, the larger the detected blobs are.
- 2) The *num\_sigma* is the number of intermediate values of standard deviations to consider between *min\_sigma* and *max\_sigma*. The *min\_sigma* is 0.
- 3) The *threshold* is the absolute lower bound for the scale-space maxima. Reducing this value detects blobs with smaller intensities. It is used to distinguish the detected blobs and the noise.

To include all seeds, we set *max\_sigma* to 30 which made it possible to detect larger seed blobs, set *num\_sigma* to 10, and *threshold* to 0.01, meaning that local maxima smaller than 0.01 will be ignored. The low threshold value helped detect blobs with lower intensities to prevent false negatives. Below is an example of automated processing of micrographs of tubes and seeds.

After running the script, the user is asked to choose files as input. The tube channel and then the seed channel are chosen. The output will show:

- 1) Number of detected networks
- 2) Number of detected seeds in each network
- 3) The X, Y coordinates of two endpoints of the nanotubes
- 4) The X, Y coordinates of the seeds



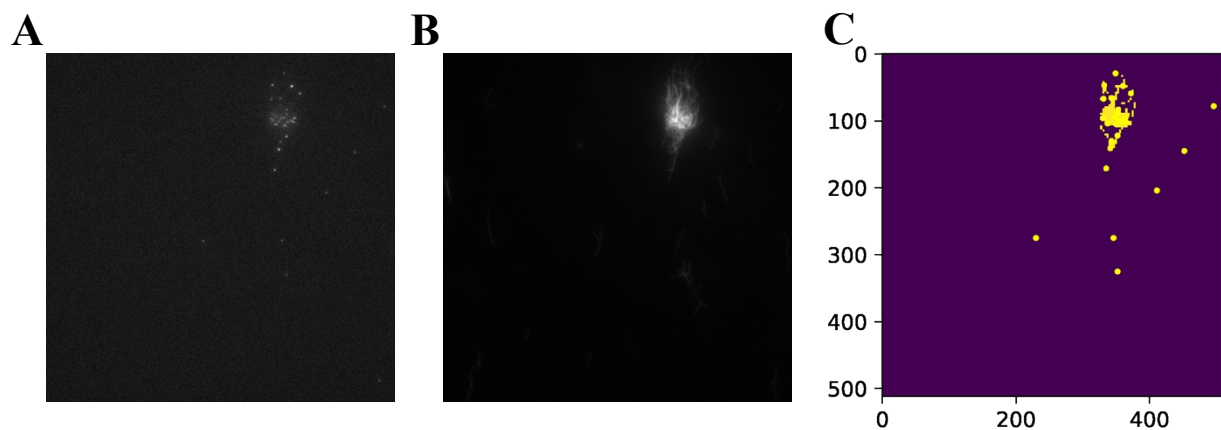

**Figure S4: Edge and blob detection on an example image.** (A) and (B) are showing the micrographs of the Y seeds and Y-seeded nanotube architectures (two fluorescence channels) taken by an inverted fluorescence microscope (Olympus IX71) after 8 hours of network formation. (C) is the processed image after detecting the seeds and nanotubes using blob and edge detection described above. The yellow dots show where the detected seeds are.

## 4. Supplementary Figures

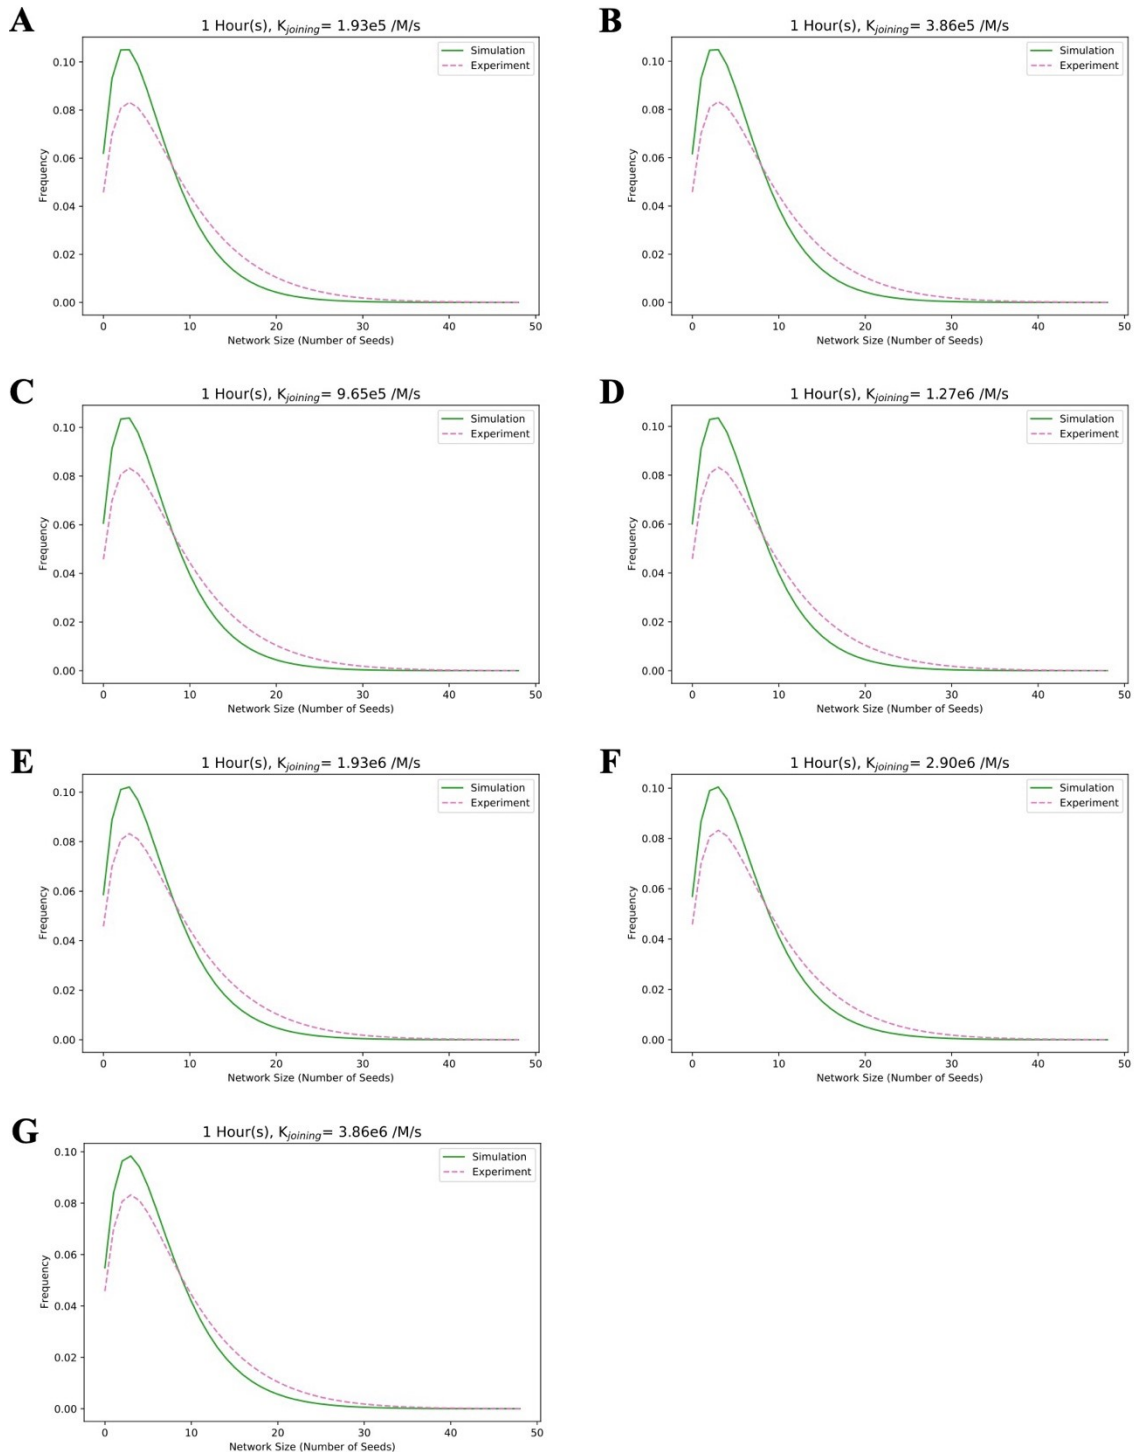

**Figure S5: Measurements of network sizes from experiments and predicted by simulations after 1 hour for different joining reaction rate constants.** The plots show the individual results included in Figure 6 of the comparison between experiments and simulations using different joining rates. All parameters and conditions are the same as Figure 6.

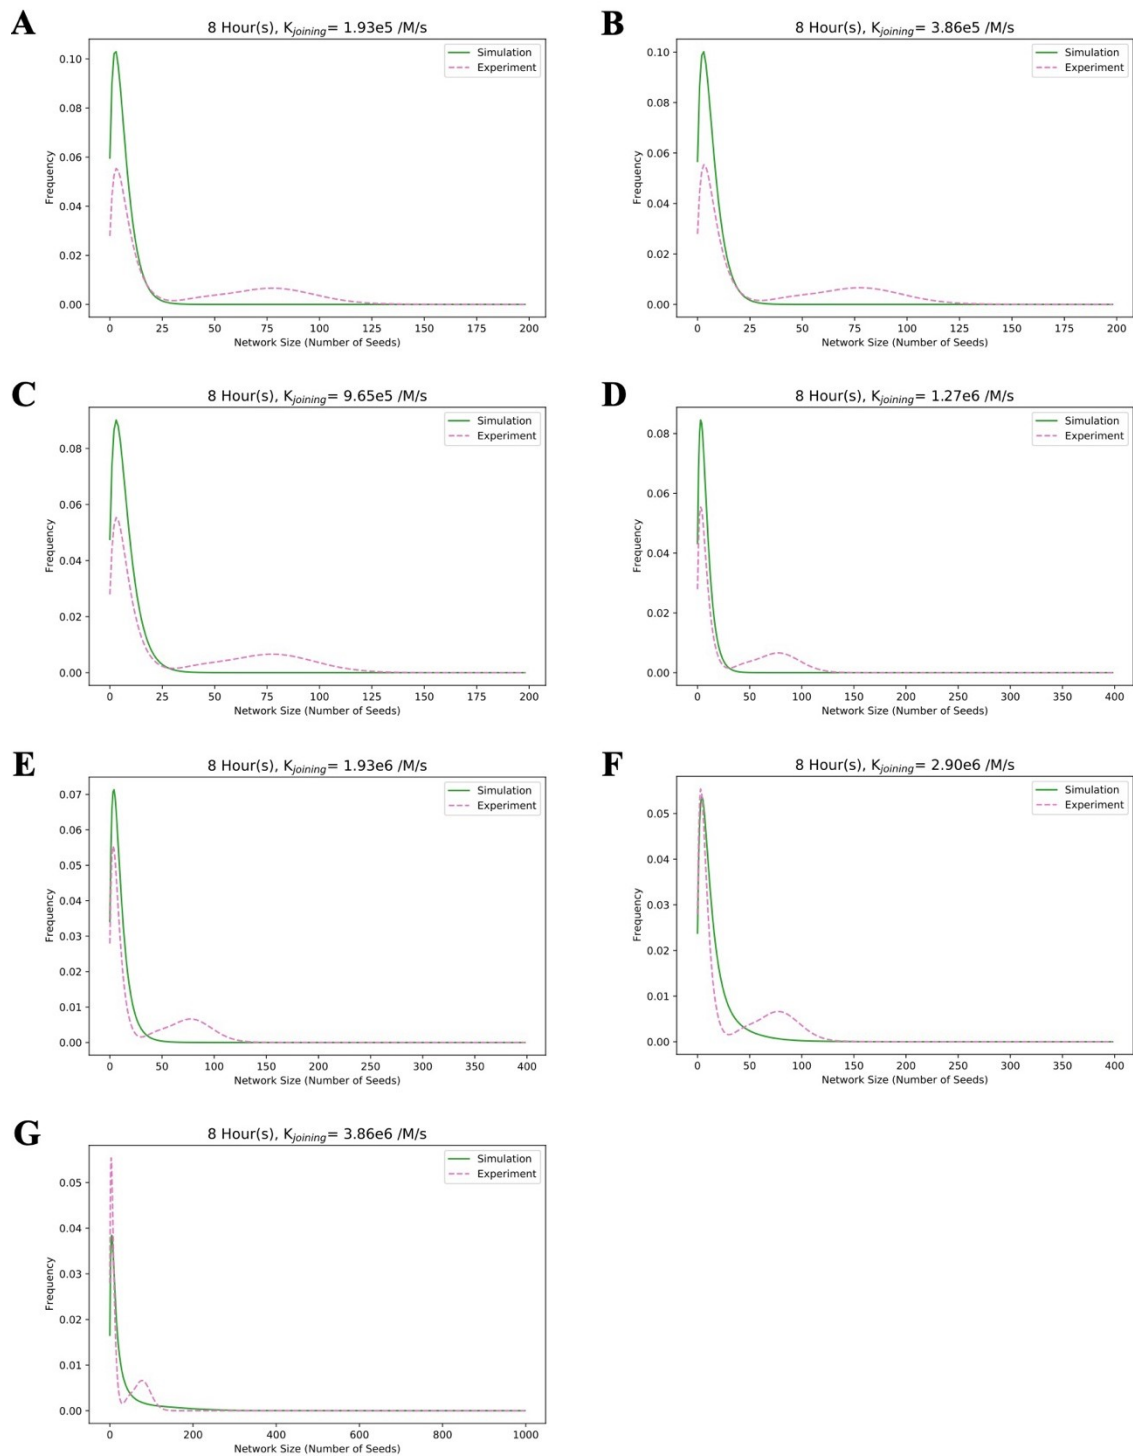

**Figure S6: Individual measurement of network size from experiments and predicted by simulation after 8 hours for different joining reaction rate constants.** The plots show the individual results included in Figure 6 of the comparison between experiments and simulations using different joining rates to show the performance of each rate. All parameters and conditions are the same as Figure 6.

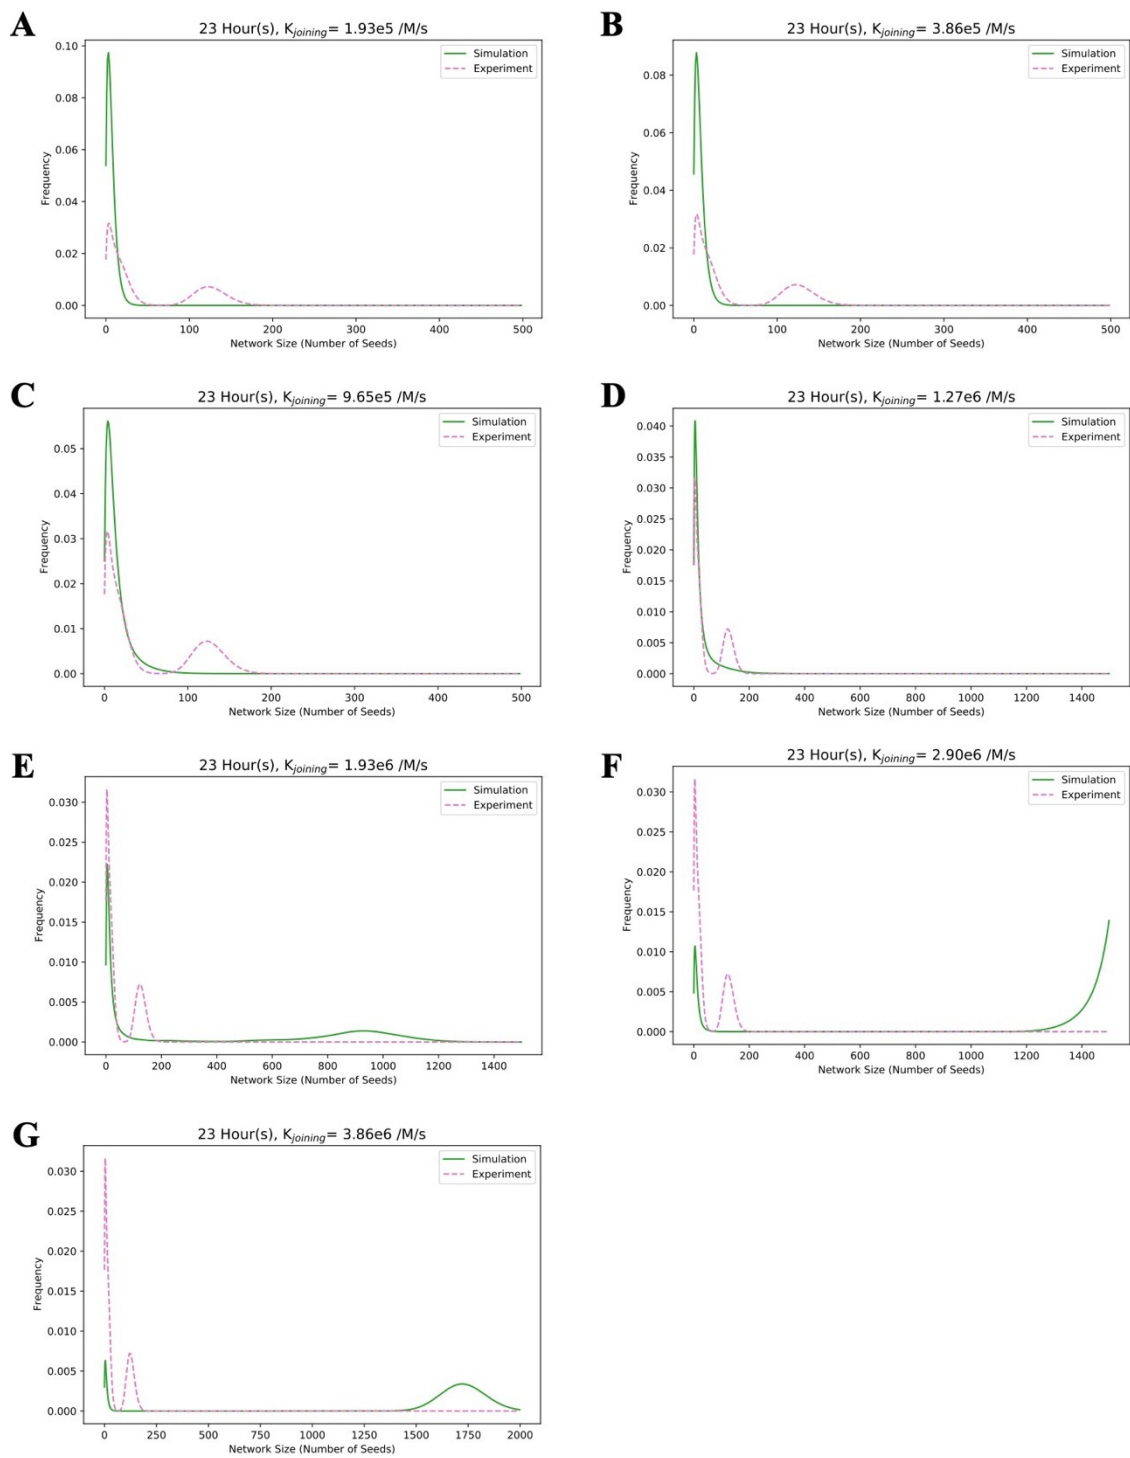

**Figure S7: Individual measurement of network size from experiments and predicted by simulation after 23 hours for different joining reaction rate constants.** The plots show the individual results included in Figure 6 of the comparison between experiments and simulations using different joining rates to show the performance of each rate. All parameters and conditions are the same as Figure 6.

For the experiments in Figures S5 – S7, we did not expect the model to fit perfectly with the experiments for these largest structures, and the model is assumed to fit better if abundant experimental data are collected. The discrepancy likely results from the fact that, during our imaging, we were not always able to observe the big clusters. In addition, when a big cluster forms, it dominates the process and can result in a large variance – essentially causing large error bars for these data.

## References

- [1] A. V. Tataurov, Y. You, R. Owczarzy, *Biophys. Chem.* 2008, 133, 66–70.
- [2] P. W. K. Rothmund, A. Ekani-Nkodo, N. Papadakis, A. Kumar, D. K. Fyngenson, E. Winfree, *J. Am. Chem. Soc.* 2004, 126, 16344–16352.
- [3] T. D. Jorgenson, A. M. Mohammed, D. K. Agrawal, R. Schulman, *ACS Nano* 2017, 11, 1927–1936.
- [4] A. M. Mohammed, P. Šulc, J. Zenk, R. Schulman, *Nat. Nanotechnol.* 2017, 12, 312–316.
- [5] D. K. Agrawal, R. Jiang, S. Reinhart, A. M. Mohammed, T. D. Jorgenson, R. Schulman, *ACS Nano* 2017, 11, 9770–9779.
- [6] M. S. Pacella, V. Mardanlou, S. Agarwal, A. Patel, E. Jelezniakov, A. M. Mohammed, E. Franco, R. Schulman, *Mol. Syst. Des. Eng.* 2020, 5, 544–558.
- [7] A. Argoti, L. T. Fan, J. Cruz, S. T. Chou, *Chem. Eng. Educ.* 2008, 42, 35–46.
- [8] D. T. Gillespie, *J. Phys. Chem.* 1977, 81, 2340–2361.
- [9] S. Van Der Walt, J. L. Schönberger, J. Nunez-Iglesias, F. Boulogne, J. D. Warner, N. Yager, E. Gouillart, T. Yu, *PeerJ* 2014, 2014, e453.
